# Supplementary material
Source: PubMed Central journal article supplement (PMC2838323)
Supplement: supp_M109.065698_jbc.M109.065698-1.pdf [file supp_M109.065698_jbc.M109.065698-1.pdf]

Fig. S1

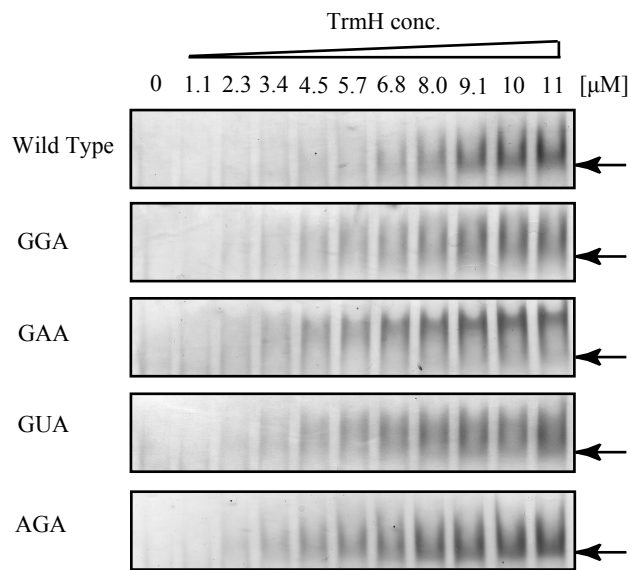

Legend to Fig. S1

**Fig. S1 gel shift assay with tRNA GGA, GAA, GUA, and AGA variants.** The RNA and TrmH complexes are indicated by arrows. These variants have a substantial affinity for TrmH.
